# Supplementary material for: Discrimination between streptavidin and avidin with fluorescent affinity-based probes
Source: Royal Society of Chemistry journal article supplement (doi:10.1039/c5an00585j), 2015-01-01
Supplement: c5an00585j1.pdf [file c5an00585j1.pdf]

## Discrimination between Streptavidin and Avidin with Fluorescent Affinity-Based Probes

Qian Sun<sup>a</sup>, Haiyu Tian<sup>a</sup>, Haoran Qu<sup>a</sup>, Deheng Sun<sup>b</sup>, Zhuo Chen<sup>b</sup>, Liping Duan<sup>c</sup>, Weibing Zhang<sup>\*a</sup> and Junhong Qian<sup>\*a</sup>

<sup>a</sup> Shanghai Key Laboratory of Functional Materials Chemistry, School of Chemistry and Molecular Engineering, East China University of Science and Technology, Shanghai, 200237, China

<sup>b</sup> School of Pharmacy, East China University of Science and Technology, Shanghai, 200237, China

<sup>c</sup> National Institute of Parasitic Diseases, Chinese Centre for Disease Control and Prevention, Shanghai, 200032, China

E-mail: junhongqian@ecust.edu.cn; weibingzhang@ecust.edu.cn

Tel: +86-21-64253068; Fax: +86-21-64233161

### Supporting Information

#### Contents

|                                                                            |    |
|----------------------------------------------------------------------------|----|
| Experimental-----                                                          | 2  |
| NMR and ESI spectra of the probes -----                                    | 8  |
| The absorption and emission spectra of the probes in various solvents----- | 11 |
| The proposed binding models of SPS3/RC3 to AV/SA -----                     | 12 |
| SA/AV effect on the emission spectra of RC4-----                           | 13 |
| Time dependent emission spectra of SPS3-SA coexisted with biotin -----     | 14 |
| Competition titration of biotin to SA/SPS3 system-----                     | 15 |
| The selectivity and competition of SPS3-BSA system -----                   | 16 |
| Fluorescent imaging of SPS3/RC3 in living-cell-----                        | 17 |
| The photophysical properties of the dyes in different solvents-----        | 20 |

## Experimental

### Materials and Reagents

All chemicals were purchased from Aladdin Corporation and used without further purification. Ultra-pure water was prepared through Sartorius Arium 611DI system.

### Spectral measurement

Stock solutions of the dyes ( $3 \times 10^{-4}$  M) were prepared in DMF, while those of biotin ( $14.4 \times 10^{-3}$  M), SA and AV (1.0 mg/mL) were prepared in PBS (10 mM, pH 7.0). The stock solutions of the dyes were diluted with corresponding solvents to acquired 10  $\mu$ M dye solution. Absorption spectra were measured with an Evolution 220 UV-Visible spectrophotometer (Thermo Scientific). Fluorescent spectra were carried out on a Lumina Fluorescence Spectrometer (Thermo Scientific). NMR spectra were performed with a Bruker AV-400 spectrometer (400M Hz). Mass spectra were recorded on a MA 1212 Instrument using standard condition (ESI, 70 ev).

### Titration of SA/AV by the probe

20  $\mu$ L of the dye stock solution were added to 2 mL of the phosphate above buffer solution (10 mM, pH 7.0) to keep the dye concentration being 3  $\mu$ M. 0 - 200  $\mu$ L of 1.0 mg/mL SA or AV PBS solutions were added into 2 mL of the dye solution (3  $\mu$ M).

### Titration of probe by SA/AV

200  $\mu$ L of 1mg/mL SA or AV stock solution were added to 1.8 mL of the PBS to keep the protein concentration being 100  $\mu$ g/mL. 0-72  $\mu$ L of the dye stock solutions were added into 2 mL of 100  $\mu$ g/mL protein solution.

### Competitive fluorescence assay of biotin

To 2 mL of the dye solution (3  $\mu$ M) added 60  $\mu$ L of 1.0 mg/mL SA - PBS solution followed by adding 20  $\mu$ L of the biotin stock solution after 10 min.

## Synthesis

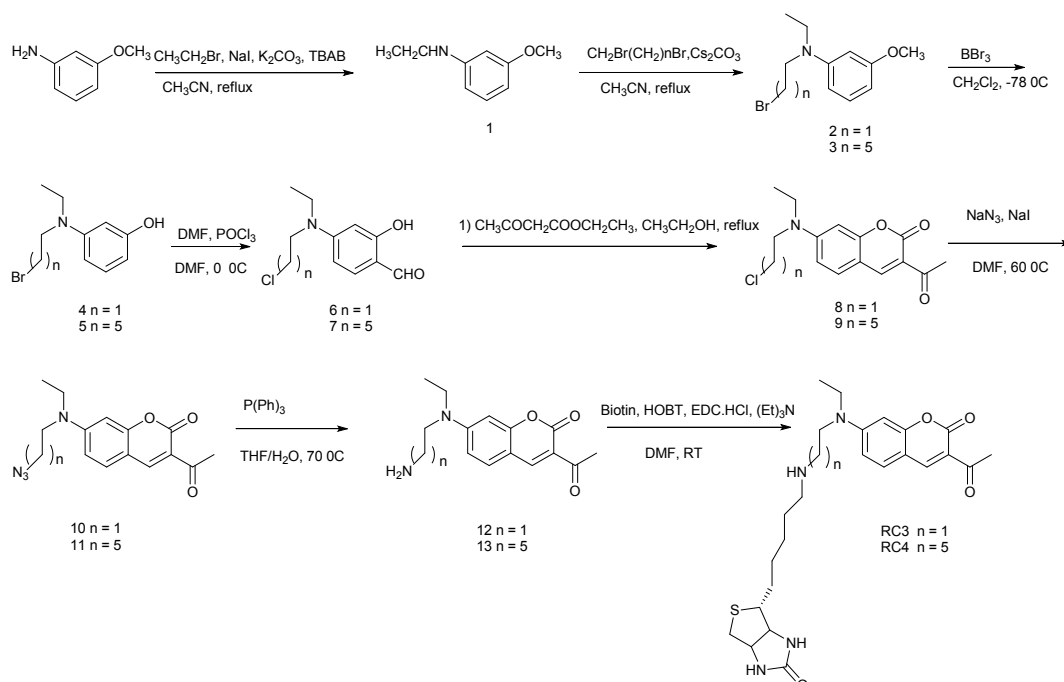

Scheme S1 Synthesis procedures of RC3 and RC4

**Synthesis of compound 1:** Commercially available 3-methoxyaniline (1.67 g, 13.6 mmol),  $K_2CO_3$  (2.82 g, 20.4 mmol), NaI (203.9 mg, 1.36 mmol) and TBAB (438 mg, 1.36 mmol) were added to acetonitrile (80 mL) in a 250 mL flask. 1.48 g (13.6 mmol) of bromoethane were added slowly to the above solution, and the mixed solution was refluxed for 8 h. After filtration, the solvent was removed under reduced pressure, and the brown residue was purified by column chromatography to give colourless oil (1.14 g, yield: 55.4%).  $^1H$  NMR (400MHz,  $CDCl_3$ )  $\delta$  (ppm): 7.08 (t,  $J = 8.1$  Hz, 1H), 6.26 (dd,  $J_1 = 1.9$  Hz,  $J_2 = 8.1$  Hz, 1H), 6.22 (dd,  $J_1 = 1.5$  Hz,  $J_2 = 8.10$  Hz, 1H), 6.16 (s, 1H), 3.77 (s, 3H), 3.14 (q,  $J = 7.2$  Hz, 2H), 1.25 (t,  $J = 7.2$  Hz, 3H).

**Synthesis of compound 2 and compound 3:** 12.42 g (66.1 mmol) of 1, 2-dibromoethane were added slowly to acetonitrile (80 mL) with compound 1 (1.00 g, 6.61 mmol) and  $Cs_2CO_3$  (3.23 g, 9.92 mmol). The above solution was refluxed for 18 h. After filtration, the solvent was removed under reduced pressure, and the brown residue was purified by column chromatography to give compound 2 as colourless oil (1.43 g, yield: 88.7%).  $^1H$  NMR (400MHz,  $CDCl_3$ )  $\delta$  (ppm): 7.08 (t,  $J = 8.1$  Hz, 1H), 6.26 (dd,  $J_1 = 1.9$  Hz,  $J_2 = 8.1$  Hz, 1H), 6.22 (dd,  $J_1 = 1.5$  Hz,  $J_2 = 8.1$  Hz, 1H), 6.16 (s, 1H), 3.77 (s, 3H), 3.66 (t,  $J = 8.3$  Hz, 2H), 3.46 (t,  $J = 8.3$  Hz, 2H), 3.40 (q,  $J = 7.0$  Hz, 2H), 1.18 (t,  $J = 7.0$  Hz, 3H). Compound 3 was obtained by the same procedures with 1, 6-dibromohexane (16.13 g) instead of 1, 2-dibromoethane (1.64 g, 78.9%).  $^1H$  NMR (400MHz,  $CDCl_3$ )  $\delta$  (ppm): 7.08 (t,  $J = 8.1$  Hz, 1H), 6.26 (dd,  $J_1 = 1.9$  Hz,  $J_2 = 8.1$  Hz, 1H), 6.22 (dd,  $J_1 = 1.5$  Hz,  $J_2 = 8.1$  Hz, 1H), 6.16 (s, 1H), 3.55 (t,  $J = 6.4$  Hz, 2H), 3.41 (t,  $J = 6.5$  Hz, 2H), 3.31 (q,  $J = 7.1$  Hz, 2H), 1.83 – 1.76 (m, 2H), 1.68 – 1.60 (m, 2H), 1.54 -1.46 (m, 2H), 1.40 – 1.33 (m, 2H), 1.18 (t,  $J = 7.0$  Hz, 3H).

**Synthesis of compound 4 and compound 5:** Under nitrogen atmosphere and at  $-78$  °C, 1 mL (10.6 mmol)  $BBr_3$  was added slowly to 40 mL of compound 2 (1.05 g, 4.30 mmol) in dichloromethane. The solution was stirred at  $-78$  °C for 30 min and at room temperature for another 3 h. Then the above solution was poured into 100 mL iced water and stirred for 10 minutes. The crude product was extracted with dichloromethane. The organic layer was washed with saturated  $NaHCO_3$  (100 mL  $\times$  2) and brine (100 mL  $\times$  2), followed by concentrated under vacuo and purified by column chromatography to give compound 4 as colourless oil (610 mg, yield: 61.6%).  $^1H$  NMR (400MHz,  $DMSO-d_6$ )  $\delta$  (ppm): 9.17 (s, 1H), 6.96 (m, 1H), 6.15 - 6.05 (m, 3H), 3.71 (t,  $J = 7.3$  Hz, 2H), 3.59 - 3.53 (m, 4H), 1.07 (t,  $J = 7.0$  Hz, 3H). Compound 5 was obtained by the same procedures with compound 3 (1.05 g) instead of compound 2 (680 mg, 67.8%).  $^1H$  NMR (400MHz,  $CDCl_3$ )  $\delta$  (ppm): 9.17 (s, 1H), 6.96 (m, 1H), 6.15 - 6.05 (m, 3H), 3.55 (t,  $J = 6.4$  Hz, 2H), 3.41 (t,  $J = 6.5$  Hz, 2H), 3.31 (q,  $J = 7.1$  Hz, 2H), 1.83 – 1.76 (m, 2H), 1.68 – 1.60 (m, 2H), 1.54 -1.46 (m, 2H), 1.40 – 1.33 (m, 2H), 1.18 (t,  $J = 7.0$  Hz, 3H).

**Synthesis of compound 6 and compound 7:** Under nitrogen atmosphere and at  $0$  °C, 1.5 mL  $POCl_3$  (16.51 mmol) were injected slowly into 2 mL freshly distilled DMF and the mixed solution was stirred for 30 min. Then compound 4 (1.90 g, 8.26 mmol) in 3 mL freshly distilled DMF were injected slowly to the above mixture. After stirred at  $0$  °C for 30 min and at  $60$  °C for 4 h, the reaction mixture was poured into 100 mL ice-water and extracted with dichloromethane. The organic layer was washed with saturated  $NaHCO_3$  (100 mL  $\times$  2) and brine (100 mL  $\times$  2), followed by concentrated under vacuo and purified by column chromatography to give compound 6 as white solid (1.25 g, yield: 70.9%).  $^1H$  NMR (400MHz,  $DMSO-d_6$ )  $\delta$  (ppm): 11.15 (s, 1H), 9.69 (s, 1H), 7.47 (d,  $J = 8.9$  Hz, 1H), 6.41 (dd,  $J_1 = 8.9$  Hz,  $J_2 = 2.3$  Hz, 1H), 6.13 (d,  $J = 2.3$  Hz, 1H), 3.75 (t,  $J = 5.3$  Hz, 2H), 3.72 (t,  $J = 5.6$  Hz, 2H), 3.49 (q,  $J = 7.1$  Hz, 2H), 1.23 (t,  $J = 7.1$  Hz, 3H).

Compound **7** was obtained by the same procedures with compound **5** instead of compound **4** (1.45 g, 69.8%). <sup>1</sup>H NMR (400MHz, DMSO-d<sub>6</sub>) δ (ppm): 11.15 (s, 1H), 9.69 (s, 1H), 7.47 (d, J = 8.9 Hz, 1H), 6.41 (dd, J<sub>1</sub> = 8.9 Hz, J<sub>2</sub> = 2.3 Hz, 1H), 6.13 (d, J = 2.3 Hz, 1H), 3.55 (t, J = 6.4 Hz, 2H), 3.41 (t, J = 6.5 Hz, 2H), 3.31 (q, J = 7.1 Hz, 2H), 1.83 – 1.76 (m, 2H), 1.68 – 1.60 (m, 2H), 1.54 -1.46 (m, 2H), 1.40 – 1.33 (m, 2H), 1.18 (t, J = 7.0 Hz, 3H).

**Synthesis of compound 8 and compound 9:** Compound **6** (500 mg, 2.20 mmol), ethyl acetoacetate (428 mg, 3.29 mmol) and 0.5 mL piperidine were dissolved in 100 mL absolute ethanol. After refluxed for 8 h, the solvent was removed under the reduced pressure, and purified with column chromatography to give compound **8** as a yellow solid (523 mg, yield: 81.1%). <sup>1</sup>H NMR (400MHz, CDCl<sub>3</sub>) δ (ppm): 8.45 (s, 1H), 7.45 (d, J = 8.9 Hz, 1H), 6.66 (dd, J<sub>1</sub> = 2.4 Hz, J<sub>2</sub> = 8.9 Hz, 1H), 6.52 (d, J = 2.2 Hz, 1H), 3.75 (t, J = 6.4 Hz, 2H), 3.66 (t, J = 6.5 Hz, 2H), 3.55 (q, J = 7.1 Hz, 2H), 2.69 (s, 3H), 1.26 (t, J = 7.1 Hz, 3H). Compound **9** was obtained (510 mg, 84.9%) by the same procedures with compound **7** (500 mg) instead of compound **6**. <sup>1</sup>H NMR (400MHz, CDCl<sub>3</sub>) δ (ppm): 8.45 (s, 1H), 7.45 (d, J = 8.9 Hz, 1H), 6.66 (dd, J<sub>1</sub> = 2.4 Hz, J<sub>2</sub> = 8.9 Hz, 1H), 6.52 (d, J = 2.2 Hz, 1H), 3.55 (t, J = 6.4 Hz, 2H), 3.47 (t, J = 6.5 Hz, 2H), 3.36 (q, J = 7.1 Hz, 2H), 2.69 (s, 3H), 1.83 – 1.76 (m, 2H), 1.68 – 1.60 (m, 2H), 1.54 -1.46 (m, 2H), 1.40 – 1.33 (m, 2H), 1.26 (t, J = 7.1 Hz, 3H).

**Synthesis of compound 10 and compound 11:** Compound **8** (400 mg, 1.36 mmol), NaI (20.4 mg, 0.13 mmol) and NaN<sub>3</sub> (442 mg, 6.81 mmol) were added to 5 mL freshly distilled DMF. After stirred under nitrogen at 80 °C for 6 h, the above solution was poured into 100 mL ice water and stirred for 10 minutes. The precipitate was filtered to give compound **10** as a yellow solid (360 mg, yield: 88.0%). <sup>1</sup>H NMR (400MHz, CDCl<sub>3</sub>) δ (ppm): 8.45 (s, 1H), 7.44 (d, J = 8.9 Hz, 1H), 6.62 (dd, J<sub>1</sub> = 2.3 Hz, J<sub>2</sub> = 8.9 Hz, 1H), 6.53 (d, J = 2.0 Hz, 1H), 3.60 – 3.52 (m, 6H), 2.69 (s, 3H), 1.26 (t, J = 7.1 Hz, 3H). Compound **11** was obtained (345 mg, 95.4%) by the same procedures with compound **9** (400 mg) instead of compound **8**. <sup>1</sup>H NMR (400MHz, CDCl<sub>3</sub>) δ (ppm): 8.45 (s, 1H), 7.44 (d, J = 8.9 Hz, 1H), 6.62 (dd, J<sub>1</sub> = 2.3 Hz, J<sub>2</sub> = 8.9 Hz, 1H), 6.53 (d, J = 2.0 Hz, 1H), 3.46 (q, J = 7.1 Hz, 2H), 3.36 (t, J = 6.4 Hz, 2H), 3.30 (t, J = 6.5 Hz, 2H), 2.69 (s, 3H), 1.83 – 1.76 (m, 2H), 1.68 – 1.60 (m, 2H), 1.54 -1.46 (m, 2H), 1.40 – 1.33 (m, 2H), 1.26 (t, J = 7.1 Hz, 3H).

**Synthesis of compound 12 and compound 13:** Compound **10** (360 mg, 1.20 mmol) and PPh<sub>3</sub> (472 mg, 1.80 mmol) were added to 20 mL of the mixed solvent [THF/H<sub>2</sub>O = 4:1 (v/v)] under nitrogen atmosphere. After stirred for 24 h at 60 °C, the solvent was removed under vacuum. The residue was purified by column chromatography to give compound **12** as a yellow solid (160 mg, 48.7%). <sup>1</sup>H NMR (400 MHz, DMSO-d<sub>6</sub>) δ (ppm): 8.45 (s, 1H), 7.66 (d, J = 9.0 Hz, 1H), 6.84 (dd, J<sub>1</sub> = 2.2 Hz, J<sub>2</sub> = 9.1 Hz, 1H), 6.52 (d, J = 2.0 Hz, 1H), 3.53 – 3.45 (m, 4H), 2.74 (t, J = 7.3 Hz, 2H), 2.53 (s, 3H), 1.13 (t, J = 7.0 Hz, 3H). Compound **13** was obtained (130 mg, 38.9%) by the same procedures with compound **11** (360 mg) instead of compound **10**. <sup>1</sup>H NMR (400 MHz, DMSO-d<sub>6</sub>) δ (ppm): 8.45 (s, 1H), 7.66 (d, J = 9.0 Hz, 1H), 6.84 (dd, J<sub>1</sub> = 2.2 Hz, J<sub>2</sub> = 9.1 Hz, 1H), 6.52 (d, J = 2.0 Hz, 1H), 3.53 – 3.45 (m, 4H), 2.74 (t, J = 7.3 Hz, 2H), 2.53 (s, 3H), 1.83 – 1.76 (m, 2H), 1.68 – 1.60 (m, 2H), 1.54 -1.46 (m, 2H), 1.40 – 1.33 (m, 2H), 1.26 (t, J = 7.1 Hz, 3H).

**Synthesis of RC3 and RC4:** Biotin (89 mg, 0.36 mmol), EDC·HCl (90 mg, 0.42 mmol), HOBT (70 mg, 0.42 mmol) and Et<sub>3</sub>N (90 μL, 0.65 mmol) were dissolved in freshly distilled DMF (5 mL) and stirred at room temperature for 50 min. Then 100 mg of compounds **12** (0.26 mmol) were added to the above solution. After stirred for another 5 h, the mixture was poured into 100 mL of ice water. The precipitate was washed in turn with saturated NH<sub>4</sub>Cl, saturated NaHCO<sub>3</sub>, brine and

then purified with column chromatography to give RC3 as a bright yellow solid (80 mg, 43.8%). <sup>1</sup>H NMR (400MHz, DMSO-d<sub>6</sub>) δ (ppm): 8.50 (s, 1H), 7.99 (t, J = 5.7 Hz, 1H), 7.68 (d, J = 9.0 Hz, 1H), 6.87 (dd, J<sub>1</sub> = 2.2 Hz, J<sub>2</sub> = 9.0 Hz, 1H), 6.69 (d, J = 2.0 Hz, 1H), 6.41 (s, 1H), 6.35 (s, 1H), 4.32 – 4.29 (m, 1H), 4.13 – 4.09 (m, 1H), 3.52 – 3.45 (m, 4H), 3.26 (q, J = 6.4 Hz, 2H), 3.09 – 3.04 (m, 1H), 2.81 (dd, J<sub>1</sub> = 5.1 Hz, J<sub>2</sub> = 12.4 Hz, 1H), 2.58 (d, J = 12.4 Hz, 1H), 2.52 (s, 3H), 2.06 (t, J = 7.3 Hz, 2H), 1.62 – 1.41 (m, 4H), 1.31 – 1.23 (m, 2H), 1.13 (t, J = 6.9 Hz, 3H). <sup>13</sup>C NMR (400MHz, DMSO-d<sub>6</sub>) δ: 194.2, 172.6, 162.7, 159.8, 158.1, 153.4, 147.6, 132.3, 115.3, 110.2, 107.7, 96.1, 61.0, 59.2, 55.4, 48.8, 45.7, 45.0, 36.1, 35.2, 30.1, 28.2, 28.0, 25.1, 12.0. HR-MS *m/z*: 501.2169 (M+H)<sup>+</sup>; calculated molecular weight of C<sub>25</sub>H<sub>33</sub>N<sub>4</sub>O<sub>5</sub>S: 501.2172 for (M+H)<sup>+</sup>. **RC4** was obtained (46 mg, 27.3%) by the same procedures with compound **13** (100 mg) instead of compound **12**. <sup>1</sup>H NMR (400MHz, DMSO-d<sub>6</sub>) δ (ppm): 8.50 (s, 1H), 7.75 (t, J = 5.4 Hz, 1H), 7.66 (d, J = 9.0 Hz, 1H), 6.79 (dd, J<sub>1</sub> = 2.3 Hz, J<sub>2</sub> = 9.0 Hz, 1H), 6.56 (d, J = 2.1 Hz, 1H), 6.42 (s, 1H), 6.36 (s, 1H), 4.30 – 4.27 (m, 1H), 4.13 – 4.09 (m, 1H), 3.50 (q, J = 7.0 Hz, 2H), 3.42 – 3.37 (m, 2H), 3.10 – 3.00 (m, 3H), 2.80 (dd, J<sub>1</sub> = 5.1 Hz, J<sub>2</sub> = 12.4 Hz, 1H), 2.56 (d, J = 12.4 Hz, 1H), 2.51 (s, 3H), 2.04 (t, J = 7.3 Hz, 2H), 1.63 – 1.36 (m, 10H), 1.25 – 1.21 (m, 2H), 1.13 (t, J = 7.0 Hz, 3H). <sup>13</sup>C NMR (400MHz, DMSO-d<sub>6</sub>) δ: 194.6, 172.2, 163.1, 160.3, 158.6, 153.6, 148.0, 132.8, 115.4, 110.6, 107.9, 96.3, 61.5, 59.6, 55.9, 52.4, 50.3, 45.3, 40.3, 38.7, 30.6, 29.6, 28.6, 28.5, 27.4, 26.7, 26.4, 25.8, 12.6. HR-MS *m/z*: 579.2617 (M+Na)<sup>+</sup>; calculated molecular weight of C<sub>29</sub>H<sub>40</sub>N<sub>4</sub>O<sub>5</sub>S: 579.2617 for (M+Na)<sup>+</sup>.

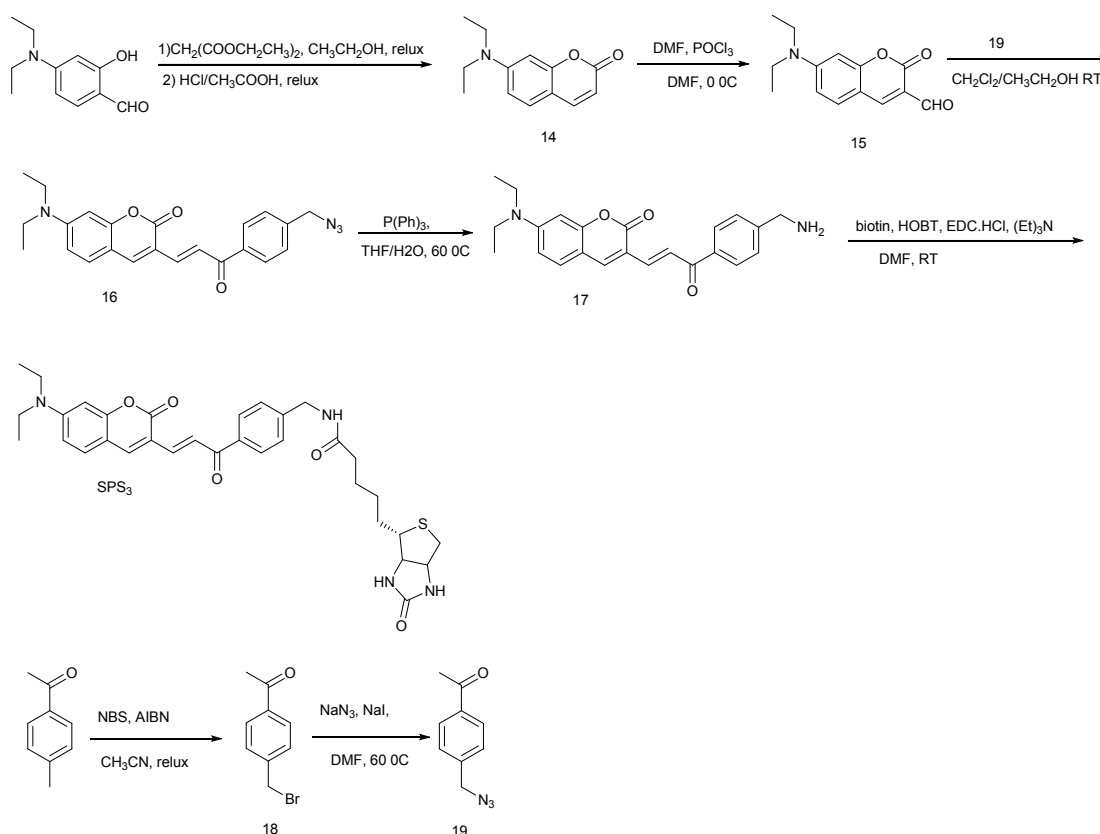

**Scheme S2** synthesis procedures of SPS3

**Synthesis of compound 14:** Commercially available 4-(diethylamino) salicylaldehyde (1.93 g, 9.99 mmol), diethyl malonate (1.92 g, 11.98 mmol) and 1 mL piperidine were dissolved in 100

mL absolute alcohol. After refluxed for 8 h, the solvent was removed under the reduced pressure. Then 40 ml of mixed solution [concentrated HCl:glacial acetic acid=1:1 (*V:V*)] was added to the crude product and refluxed for another 7 h. The reaction solution was poured into 300 mL of ice water after cooling to room temperature. The solution's pH was adjusted to ~5 with NaOH solution. The solid was filtered and purified over column chromatography to give a yellow solid of compound **14** (1.60 g, yield: 73.7%). <sup>1</sup>H NMR (400 MHz, CDCl<sub>3</sub>) δ: 10.12 (s, 1H), 8.26 (s, 1H), 7.42 (d, J=9.0 Hz, 1H), 6.64 (dd, J=2.5, 9.0 Hz, 1H), 6.49 (d, J=2.3 Hz, 1H), 3.48 (q, J=7.1 Hz, 4H), 1.26 (t, J=7.1 Hz, 6H).

**Synthesis of compound 15:** 1.0 mL POCl<sub>3</sub> (11.0 mmol) was injected in freshly distilled DMF slowly under nitrogen atmosphere at 0 °C and stirred for 30 min. Then compound **1** (1.20 g, 5.52 mmol) in 5 mL distilled DMF was injected to the reaction mixture at 0 °C slowly. After stirred for another 30 min, the solution was slowly warmed to 60 °C and stirred for 4h. Then the reaction solution was poured into 100 mL ice water and its pH was adjusted to ~5 with NaOH solution. The solid was filtered and was purified by column chromatography to give a orange-brown solid (850 mg, yield: 62.7 %). <sup>1</sup>H NMR (400MHz, DMSO-d<sub>6</sub>) δ: 8.49 (s, 1H), 8.06 (d, J = 8.2 Hz, 2H), 8.03 (d, J = 15.5 Hz, 1H), 7.67 (d, J = 15.4 Hz, 1H), 7.57 (d, J = 8.2 Hz, 2H), 7.50 (d, J = 9.0 Hz, 1H), 6.81 (dd, J<sub>1</sub> = 1.5 Hz, J<sub>2</sub> = 9.0 Hz, 1H), 6.61 (s, 1H), 6.48 (s, 1H), 6.38 (s, 1H), 4.60 (s, 2H), 3.48 (q, J = 7.0 Hz, 4H), 1.15 (t, J = 7.0 Hz, 6H)

**Synthesis of compound 18:** Commercially available p-methylacetophenone (3.0 g, 22.36 mmol), NBS (6.4 g, 36.1 mmol) and AIBN (367 mg, 2.24 mmol) were added to 100 mL acetonitrile in 250 mL flask. After refluxed for 6 h, the solvent was removed under reduced pressure and the residue was further purified by column chromatography to give compound **18** as a colorless oil (3.8 g, yield: 79.8%). <sup>1</sup>H NMR (400MHz, CDCl<sub>3</sub>) δ: 7.93 (d, J = 8.3 Hz, 1H), 7.48 (d, J = 8.2 Hz, 1H), 4.50 (s, 2H), 2.60 (s, 3H)

**Synthesis of compound 19:** Compound **18** (1.10 g, 5.16 mmol), NaI (77 mg, 0.52mmol) and NaN<sub>3</sub> (1.01 g, 15.5 mmol) were added in 5 mL distilled DMF, the solution was stirred under nitrogen at 80 °C for 8 h. Then the reaction solution was poured into 100 mL ice water and extracted with dichloromethane and water. The organic layer was washed with sat. NaHCO<sub>3</sub> (100 mL × 2) and brine (100 mL × 2), concentrated in vacuo and purified by column chromatography to give compound **19** as a colorless oil (600 mg, yield: 66.3%). <sup>1</sup>H NMR (400MHz, CDCl<sub>3</sub>) δ: 7.93 (d, J = 8.3 Hz, 1H), 7.48 (d, J = 8.2 Hz, 1H), 4.43 (s, 2H), 2.61 (s, 3H)

**Synthesis of compound 16:** Compound **15** (300 mg, 1.22 mmol) and compound **19** (386 mg, 2.20mmol) were added to 20 mL of the mixed solvent [CH<sub>2</sub>Cl<sub>2</sub>/anhydrous CH<sub>3</sub>CH<sub>2</sub>OH=1:1 (*V:V*)], then 10 drops of pyrrolidine were dropped into the above solution. The mixture was stirred at room temperature for 1 d, and the solvent was removed under reduced pressure. The residue was purified by column chromatography to give compound **16** as a bright red solid (210 mg, 42.1%). <sup>1</sup>H NMR (400MHz, DMSO-d<sub>6</sub>) δ: 8.49 (s, 1H), 8.06 (d, J = 8.2 Hz, 2H), 8.03 (d, J = 15.4 Hz, 1H), 7.67 (d, J = 15.4 Hz, 1H), 7.57 (d, J = 8.2 Hz, 2H), 7.50 (d, J = 9.0 Hz, 1H), 6.80 (dd, J<sub>1</sub> = 9.0 Hz, J<sub>2</sub> = 2.2 Hz, 1H), 6.60 (d, J = 2.1 Hz, 1H), 4.60 (s, 2H), 3.48 (q, J = 7.0 Hz, 4H), 1.15 (t, J = 7.0 Hz, 6H).

**Synthesis of compound 17:** Compound **16** (210 mg, 0.52 mmol) and PPh<sub>3</sub> (205 mg, 0.78 mmol) were added to 20 mL of the mixed solvent [THF/H<sub>2</sub>O=4:1 (*V:V*)] under nitrogen atmosphere. After stirring for 24 h at 60 °C, the solvent was removed under vacuum. The residue was purified by column chromatography to give compound **17** as a bright red solid (150 mg, 71.3%). <sup>1</sup>H NMR

(400MHz, DMSO-d<sub>6</sub>)  $\delta$ : 8.49 (s, 1H), 8.06-8.00 (m, 3H), 7.66 (d, J = 15.4 Hz, 1H), 7.56 (d, J = 8.1 Hz, 2H), 7.51 (d, J = 9.0 Hz, 1H), 6.80 (dd, J<sub>1</sub> = 1.5 Hz, J<sub>2</sub> = 8.9 Hz, 1H), 6.6 (s, 1H), 3.86 (s, 2H), 3.49 (q, J = 7.0 Hz, 4H), 1.15 (t, J = 7.0 Hz, 6H)

**Synthesis of SPS3:** Biotin (65 mg, 0.26 mmol), EDC·HCl (65 mg, 0.31 mmol), HOBt (54 mg, 0.31 mmol) and Et<sub>3</sub>N (65  $\mu$ L, 0.47 mmol) in DMF (5 mL) at room temperature. After stirred for 50 minutes, compounds **4** (105 mg, 0.26 mmol) was added to the above solution and stirred for another 5 h. Then the reaction solution was poured into 100 mL ice water, and the solid was filtered. The solid was further washed with sat. NH<sub>4</sub>Cl, sat. NaHCO<sub>3</sub> and brine and purified by column chromatography to give **SPS3** as a bright red solid (82 mg, yield: 51.2%). <sup>1</sup>H NMR (400MHz, DMSO-d<sub>6</sub>)  $\delta$ : 8.48 (s, 1H), 8.04-8.00 (m, 3H), 7.66 (d, J = 15.3 Hz, 1H), 7.51 (d, J = 9.0 Hz, 1H), 7.43 (d, J = 8.0 Hz, 2H), 6.80 (dd, J<sub>1</sub> = 1.5 Hz, J<sub>2</sub> = 8.9 Hz, 1H), 6.61 (s, 1H), 4.35 (d, J = 5.6 Hz, 2H), 4.32 (t, J = 6.3 Hz, 1H), 4.12 (t, J = 5.0 Hz, 1H), 3.49 (q, J = 6.9 Hz, 4H), 3.07 (m, 1H), 2.83 (dd, J<sub>1</sub> = 7.4 Hz, J<sub>2</sub> = 12.4 Hz, 4H), 2.59 (d, J = 12.4 Hz, 1H), 2.18 (t, J = 7.2 Hz, 2H), 1.64-1.43 (m, 4H), 1.38-1.29 (m, 2H), 1.15 (t, J = 7.0 Hz, 6H). <sup>13</sup>C NMR (400MHz, DMSO-d<sub>6</sub>)  $\delta$ : 188.9, 172.7, 163.2, 160.4, 156.9, 152.4, 146.1, 145.6, 139.8, 136.9, 131.1, 128.8, 127.7, 127.3, 113.7, 110.4, 108.3, 96.7, 61.5, 59.7, 55.9, 45.9, 44.8, 42.3, 35.7, 28.7, 28.5, 25.8, 12.8. HR-MS *m/z*: 603.2643 (M+H)<sup>+</sup>; calculated molecular weight of C<sub>33</sub>H<sub>38</sub>N<sub>4</sub>O<sub>5</sub>S: 603.2596 for (M+H)<sup>+</sup>.

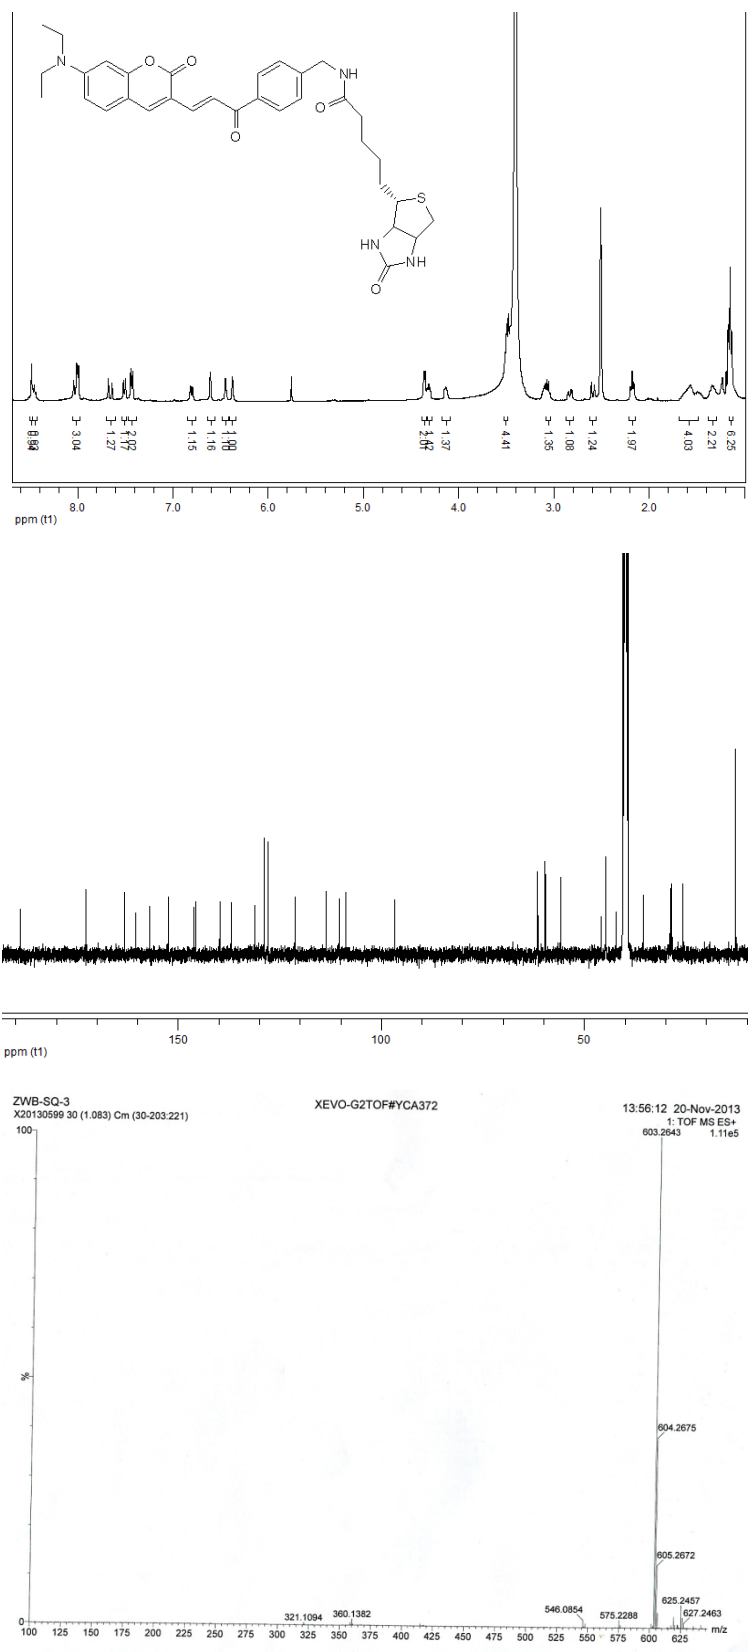

**Fig. S1** <sup>1</sup>H-NMR, <sup>13</sup>C-NMR and HRMS spectra of SPS3.



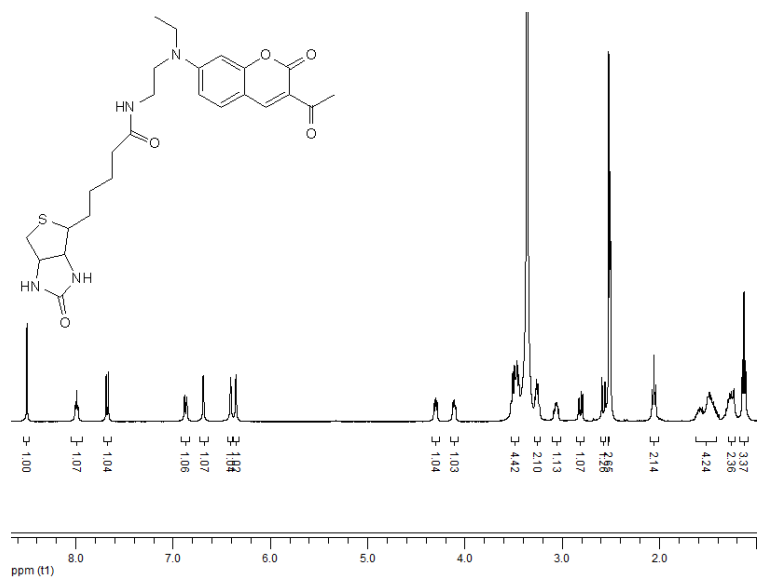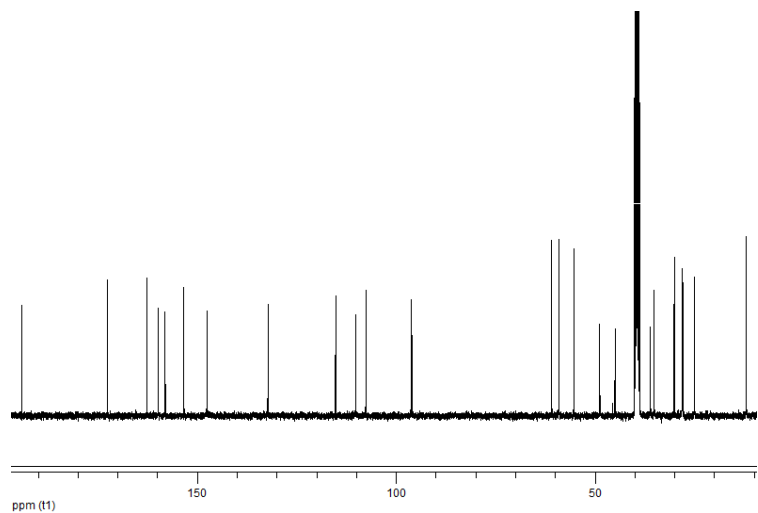

WB-ZHANG

ECUST institute of Fine Chem

05-Jun-2014

ZWB-SQ-86 62 (0.472) Cm (57.62)

21:38:57  
1: TOF MS ES+  
4.35e+003

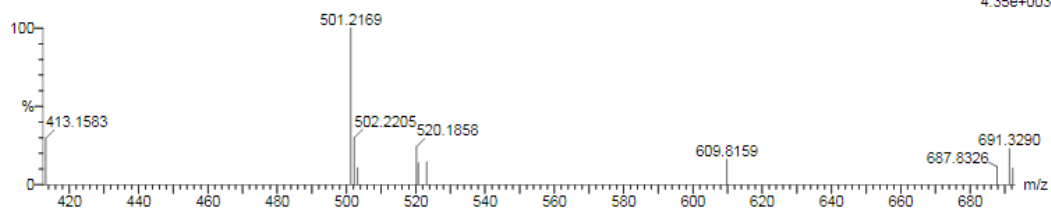

Fig. S2  $^1\text{H-NMR}$ ,  $^{13}\text{C-NMR}$  and HRMS spectra of RC3.

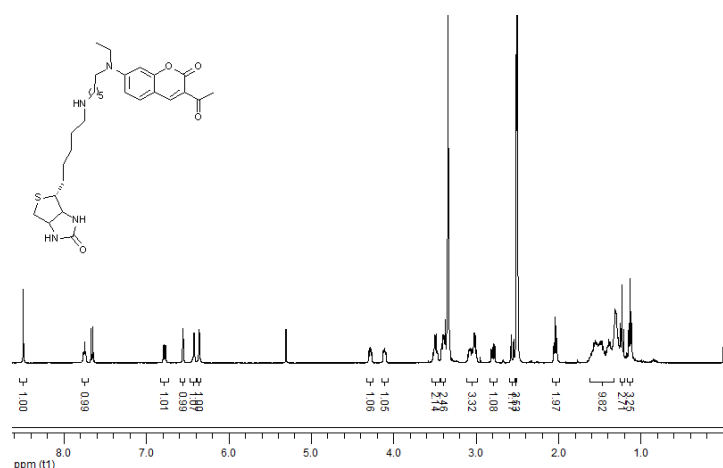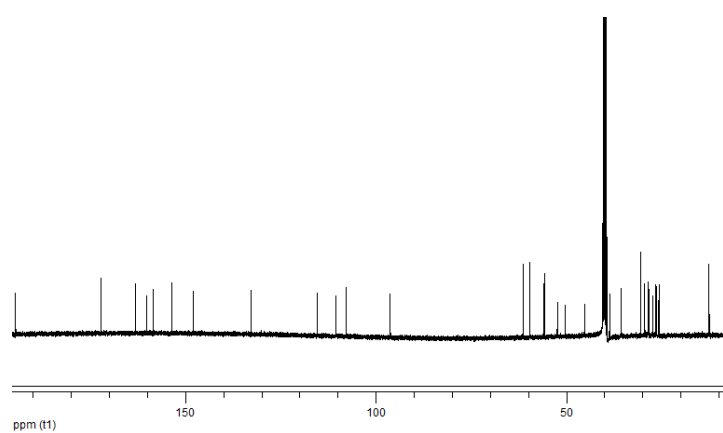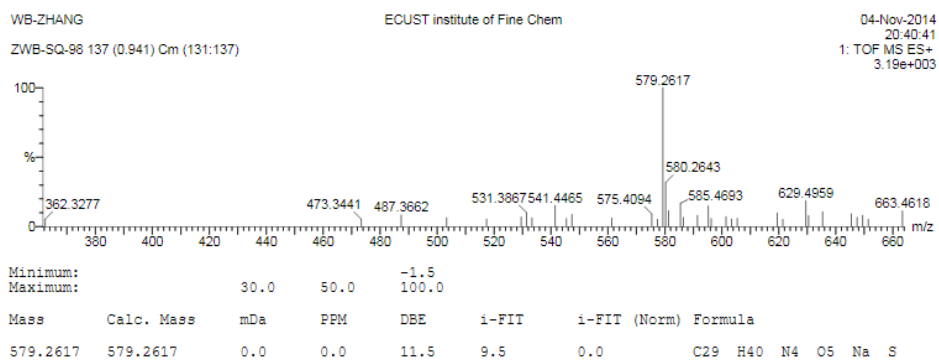

Fig. S3 <sup>1</sup>H-NMR, <sup>13</sup>C-NMR and HRMS spectra of RC4.

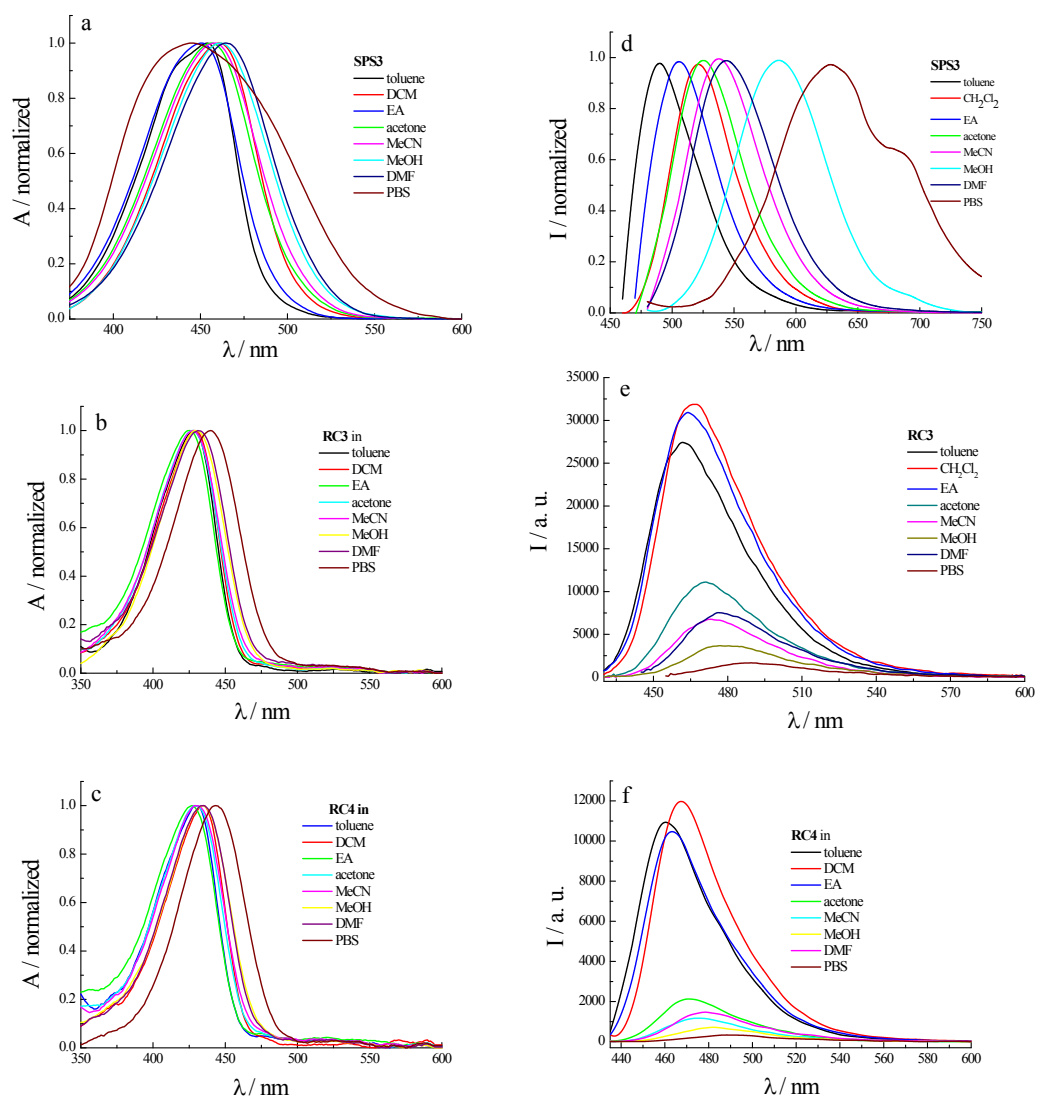

**Fig. S4** The normalized absorption (a-c) and emission (d-f) spectra of three dyes in various solvents,  $[SPS3] = [RC3] = [RC4] = 10 \mu M$ .

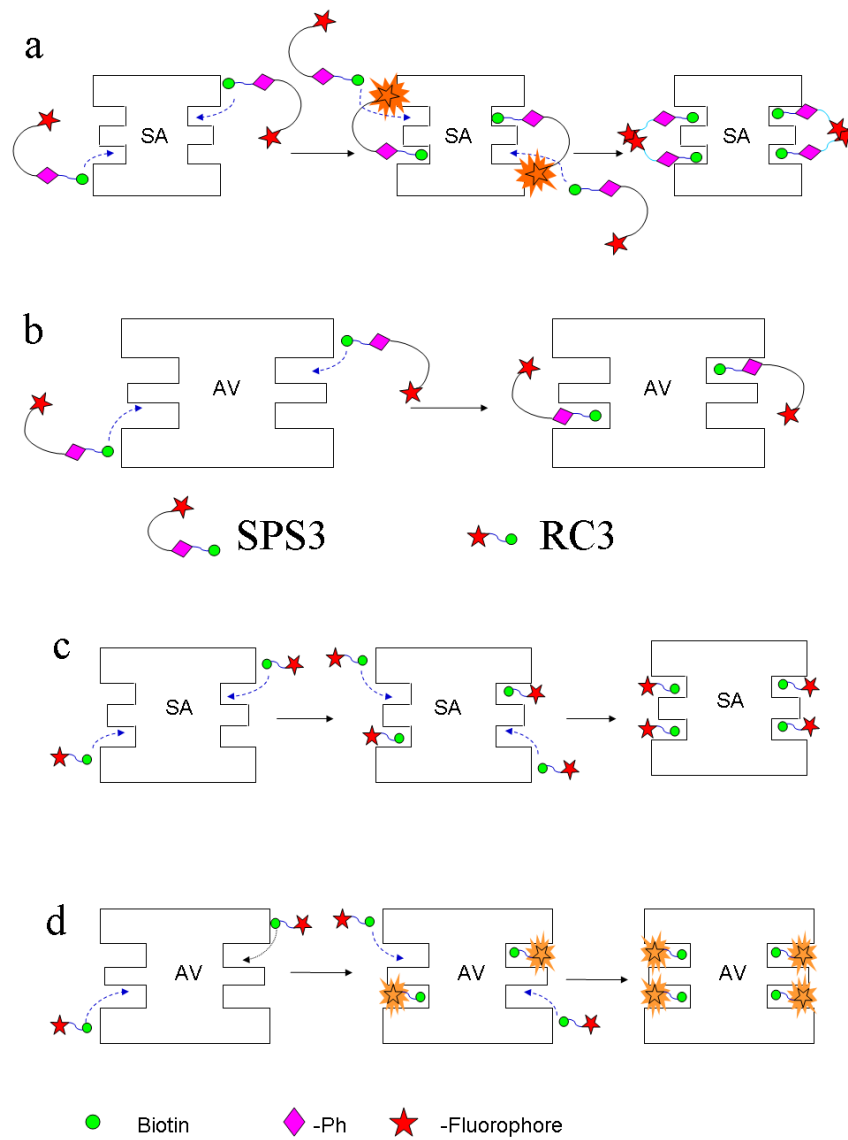

**Fig. S5** The proposed binding models of SPS3 (a-b)/RC3 (c-d) to AV/SA.

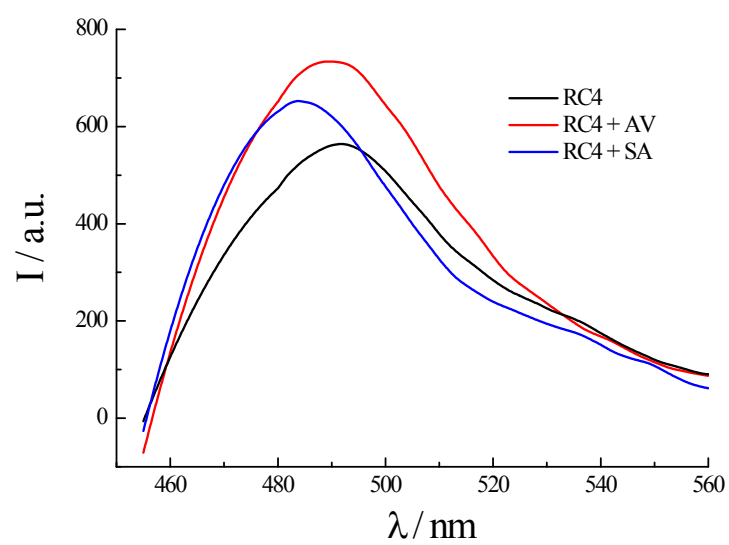

**Fig. S6** The emission spectra of RC4 in the absence and presence of SA/AV; 10 mM PBS, pH 7.0, [RC4] = 3  $\mu\text{M}$ , [SA] = [AV] = 1.5  $\mu\text{M}$ ,  $\lambda_{\text{ex}}$  = 435 nm.

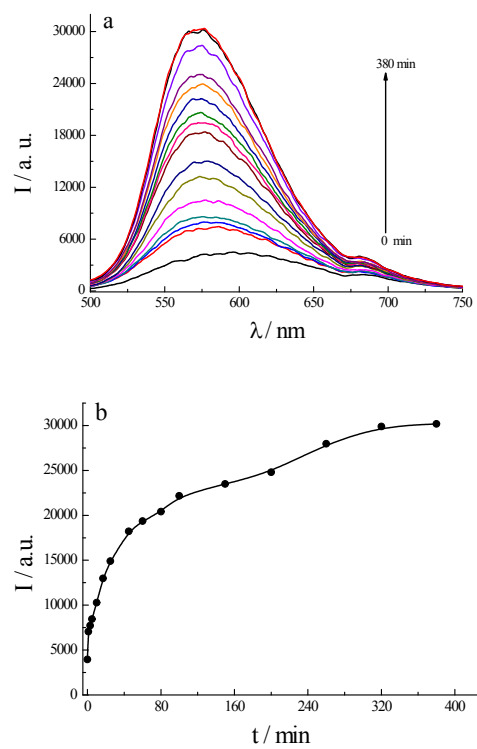

**Fig. S7** Time-dependent emission spectra (a) and time-dependent fluorescence intensity at  $\lambda = 560$  nm (b) of SPS3-SA-biotin system. [SPS3] = 3  $\mu$ M, [SA] = 0.75  $\mu$ M, [biotin] = 144  $\mu$ M, 10 mM PBS, pH 7.0,  $\lambda_{\text{ex}} = 465$  nm.

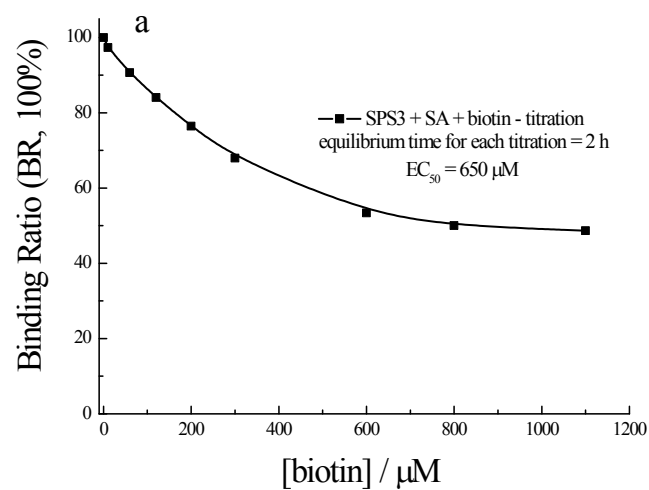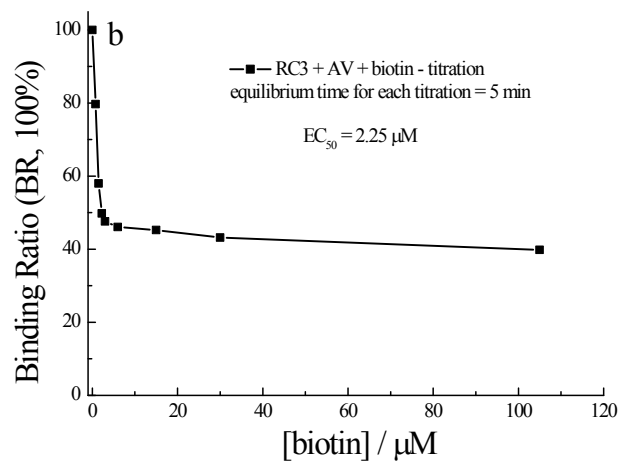

**Fig. S8** Competition titration of biotin to SPS3-SA (a) and RC3-AV (b) systems,  $[\text{SPS3}] = [\text{RC3}] = 6 \mu\text{M}$ ,  $[\text{SA}] = [\text{AV}] = 1.5 \mu\text{M}$ .

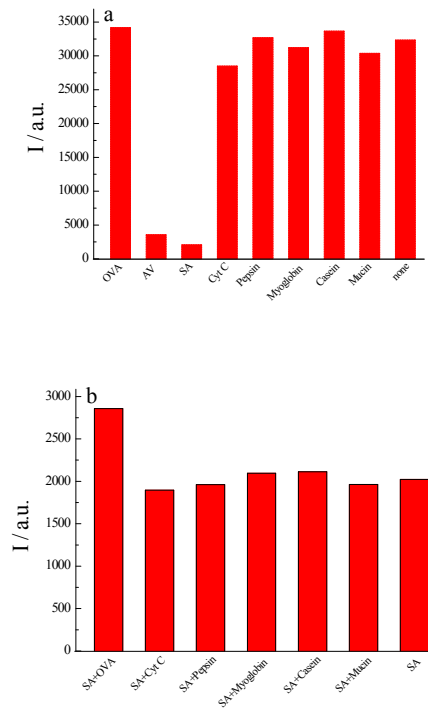

**Fig. S9** The fluorescence intensity of SPS3-BSA system in the presence of 0.1 mg/mL of various proteins (a), and the competition of SPS3-BSA system toward SA over other proteins (b). [SA] = [AV] = 0.45  $\mu$ M (0.03 mg/mL), [BSA] = 3.0 mg/mL, [SPS3] = 3.0  $\mu$ M, 10 mM PBS, pH 7.0,  $\lambda_{ex}$  = 465 nm,  $\lambda_{em}$  = 550 nm.



HeLa cell

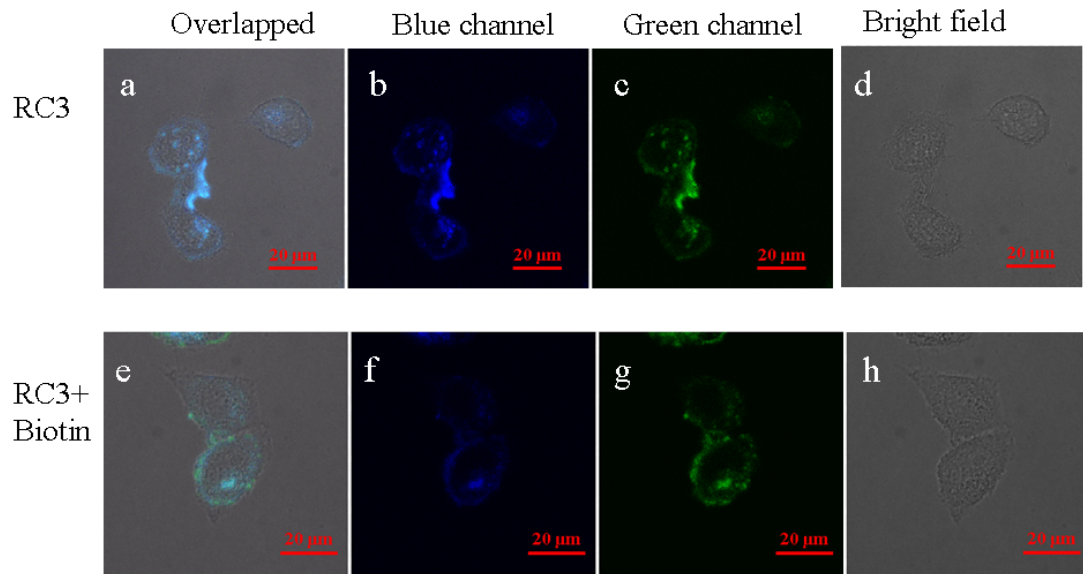

**Fig. S10** Confocal fluorescence (b-c, f-g), bright-field (d, h) and the merged fluorescence (a, e) images of living HeLa cells incubated with RC3 (10  $\mu\text{M}$ ) for 60 min (a-d) and pretreated with 10  $\mu\text{M}$  biotin for 1h (e-h) followed by incubated with RC3 for another 1h. Excited at 404 nm; (b, f): blue channel; (c, g): green channel.

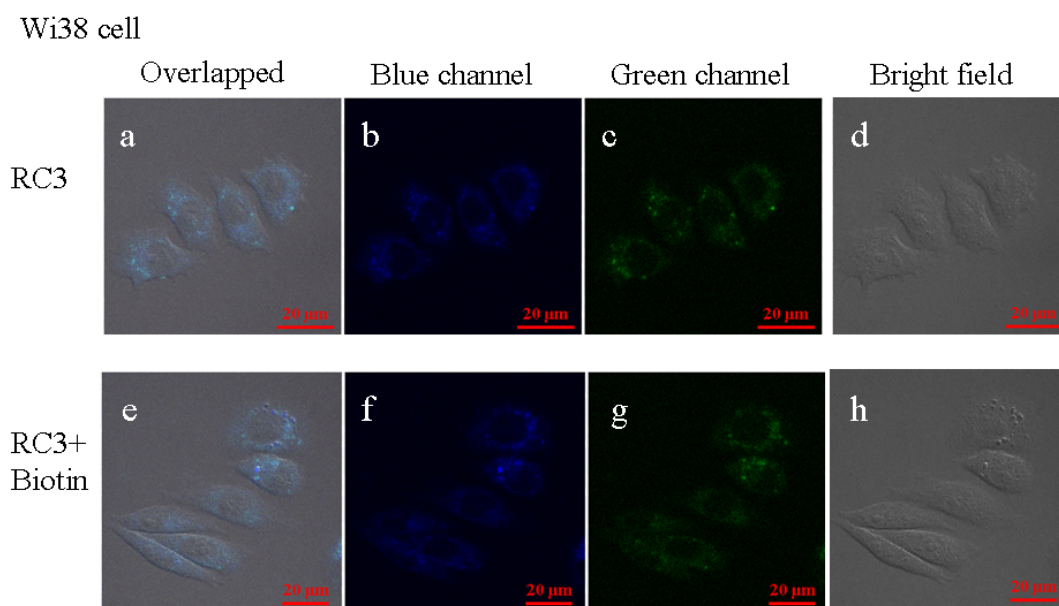

**Fig. S11** Confocal fluorescence (b-c, f-g), bright-field (d, h) and the merged fluorescence (a, e) images of living normal Lung cells Wi38 incubated with RC3 (10  $\mu$ M) for 60 min (a-d) and pretreated with 10  $\mu$ M biotin for 1h (e-h) followed by incubated with RC3 for another 1h. Excited at 404 nm; (b, f): blue channel; (c, g): green channel.

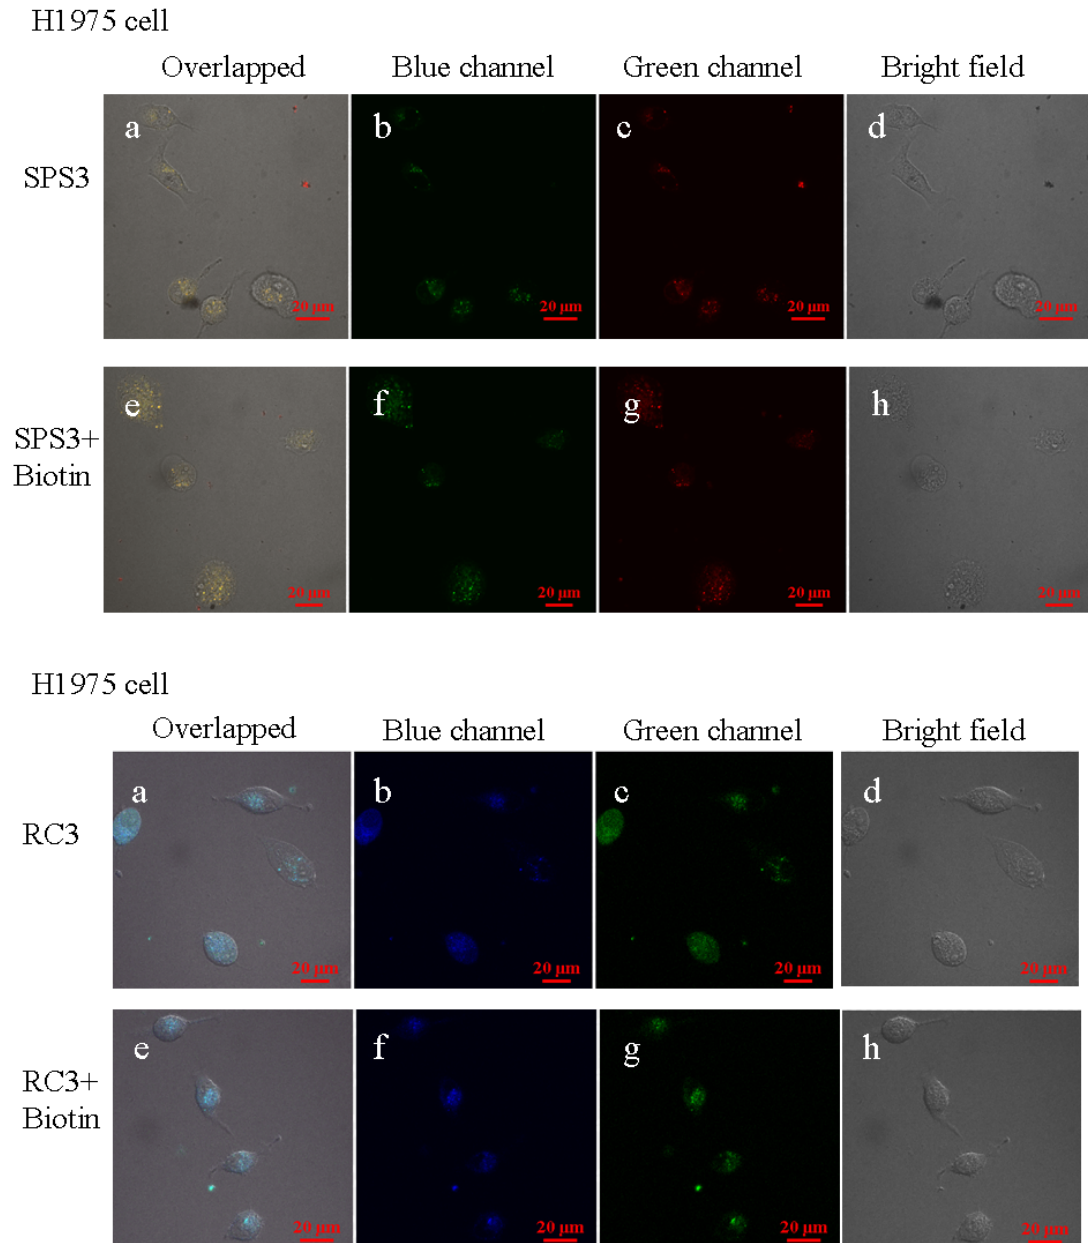

**Fig. S12** Confocal fluorescence (b-c, f-g), bright-field (d, h) and the merged fluorescence (a, e) images of living Lung cancer cells H1975 incubated with SPS3/RC3 (10  $\mu$ M) for 60 min (a-d) and pretreated with 10  $\mu$ M biotin for 1h (e-h) followed by incubated with SPS3/RC3 for another 1h. For SPS3 excited at 488 nm; (b, f): green channel; (c, g): red channel; for RC3 excited at 404 nm; (b, f): blue channel; (c, g): green channel.

**Table S1** The photophysical properties of three compounds in various solvents

| Solvent <sup>b</sup> | Probe | $\lambda_{ab}$ / nm | $\lambda_{em}$ / nm | Stokes shift / nm | <sup>a</sup> $\Phi_f$ |
|----------------------|-------|---------------------|---------------------|-------------------|-----------------------|
| toluene              | SPS3  | 454                 | 490                 | 36                | 0.63                  |
|                      | RC3   | 428                 | 460                 | 32                | 1.04                  |
|                      | RC4   | 429                 | 460                 | 31                | 0.99                  |
| dichloromethane      | SPS3  | 461                 | 521                 | 60                | 0.45                  |
|                      | RC3   | 429                 | 466                 | 37                | 0.97                  |
|                      | RC4   | 435                 | 468                 | 33                | 0.88                  |
| ethylacetate         | SPS3  | 451                 | 506                 | 55                | 0.57                  |
|                      | RC3   | 425                 | 463                 | 38                | 0.85                  |
|                      | RC4   | 427                 | 463                 | 36                | 0.67                  |
| acetone              | SPS3  | 457                 | 525                 | 68                | 0.49                  |
|                      | RC3   | 427                 | 471                 | 44                | 0.36                  |
|                      | RC4   | 429                 | 471                 | 42                | 0.15                  |
| acetonitrile         | SPS3  | 459                 | 537                 | 78                | 0.51                  |
|                      | RC3   | 428                 | 473                 | 45                | 0.23                  |
|                      | RC4   | 429                 | 475                 | 46                | 0.08                  |
| Methanol             | SPS3  | 462                 | 586                 | 124               | 0.14                  |
|                      | RC3   | 429                 | 480                 | 51                | 0.11                  |
|                      | RC4   | 435                 | 482                 | 47                | 0.05                  |
| DMF                  | SPS3  | 465                 | 543                 | 78                | 0.47                  |
|                      | RC3   | 429                 | 478                 | 49                | 0.24                  |
|                      | RC4   | 435                 | 479                 | 44                | 0.10                  |
| PBS                  | SPS3  | 445                 | 628                 | 183               | 0.004                 |
|                      | RC3   | 440                 | 489                 | 49                | 0.053                 |
|                      | RC4   | 443                 | 488                 | 45                | 0.027                 |

<sup>a</sup> Coumarin 153 ( $\Phi_f = 0.38$  in ethanol) was used as the reference; <sup>b</sup> containing 1% DMF.
